# Supplementary material for: HSPC111 Governs Breast Cancer Growth by Regulating Ribosomal Biogenesis
Source: Oxford University Press journal article supplement (doi:10.1158/1541-7786.mcr-13-0168), 2014-01-15
Supplement: 15417786mcr130168-sup-figleg.pdf [file 15417786mcr130168-sup-figleg.pdf]

## S Figure Legend

S Fig. 1. Representative results of c-Myc and HSPC111 expression. The mRNA levels of c-Myc and HSPC111 were evaluated by end-point PCR in MCF-7 cells upon induction of tamoxifen (at 1 $\mu$ M) for 24 hrs.
